# Supplementary material for: A lateral flow strip for on-site detection of homocysteine based on a truncated aptamer
Source: Royal Society of Chemistry journal article supplement (doi:10.1039/d4ay00274a), 2024-01-01
Supplement: d4ay00274a1.pdf [file d4ay00274a1.pdf]

## Supplementary Information

### **A lateral flow strip for on-site detection of homocysteine based on a truncated aptamer**

Yunqing Wu, Tianyu Huang, Xin Chen, Mingyuan Wang, Xiaoli Wang, Yuting Zhang, Nandi Zhou\*

The Key Laboratory of Carbohydrate Chemistry and Biotechnology, Ministry of Education, School of Biotechnology, Jiangnan University, Wuxi 214122, China

\*Corresponding author. Tel: +86-510-85197831; E-mail: [zhounandi@jiangnan.edu.cn](mailto:zhounandi@jiangnan.edu.cn)

**Table S1.** The sequences used in this study.

| Name             | Sequence (5'-3')                                                       |
|------------------|------------------------------------------------------------------------|
| Original aptamer | ACCAGCACATTCGATTATACCAGCTTATTCAATTC<br>ACAGCTATGTCCTATACCAGCTTATTCAATT |
| Apt              | ACCAGCACCCAGCTTATTCAATTCACAGCTATGT<br>CCTATACCAG <u>CTTATTCAATT</u>    |
| Apt-F            | 6'FAM-<br>ACCAGCACCCAGCTTATTCAATTCACAGCTATGT<br>CCTATACCAGCTTATTCAATT  |
| Apt-B            | BHQ-1-<br>ACCAGCACCCAGCTTATTCAATTCACAGCTATGT<br>CCTATACCAGCTTATTCAATT  |
| Apt-C            | AATTGAATAAGCTGGTATAGGACATAGCTGTGAA<br>TTGAATAAGCTGGGTGCTGGT            |
| cDNA             | HS-(CH <sub>2</sub> ) <sub>6</sub> -AAAAAA <u>AATTGAATAAG</u>          |
| cDNA-F           | AAAAAAATTGAATAAG-6'FAM                                                 |
| DNA1             | biotin-AAAAAA <i>CTTATTCA</i>                                          |
| DNA2             | biotin- <i>CTTATTCAATTTTTTTT</i>                                       |

The underlined oligonucleotides are complementary sequences between cDNA and Apt, while the italicized segments correspond to the complementary region of DNA1 and DNA2 with cDNA.

**Table S2** The comparison of the sensor with other reported homocysteine sensors.

| Method                    | Linear range   | LOD          | Time   | Reference     |
|---------------------------|----------------|--------------|--------|---------------|
| Electrochemical detection | 2-14 mM        | 6.9 $\mu$ M  | 1 h    | <sup>33</sup> |
| Fluorescence detection    | 10-100 $\mu$ M | 1.45 $\mu$ M | 40 min | <sup>34</sup> |
| Immunofluorescence strip  | 1-50 $\mu$ M   | 0.26 $\mu$ M | 30 min | <sup>35</sup> |
| LFS biosensor             | 5-50 $\mu$ M   | 4.18 $\mu$ M | 5 min  | This work     |

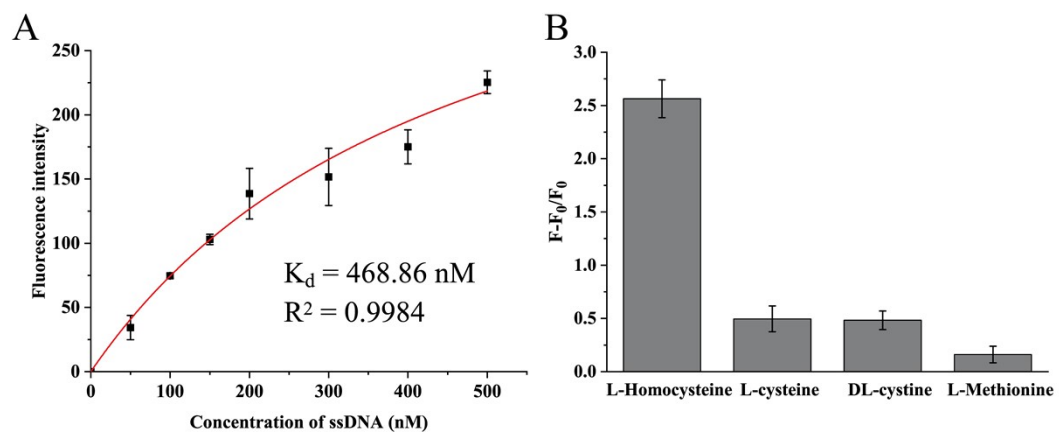

**Fig. S1.** (A) The saturation curve and  $K_d$  value of the original aptamer. (B) Verification of the specificity of original aptamer.

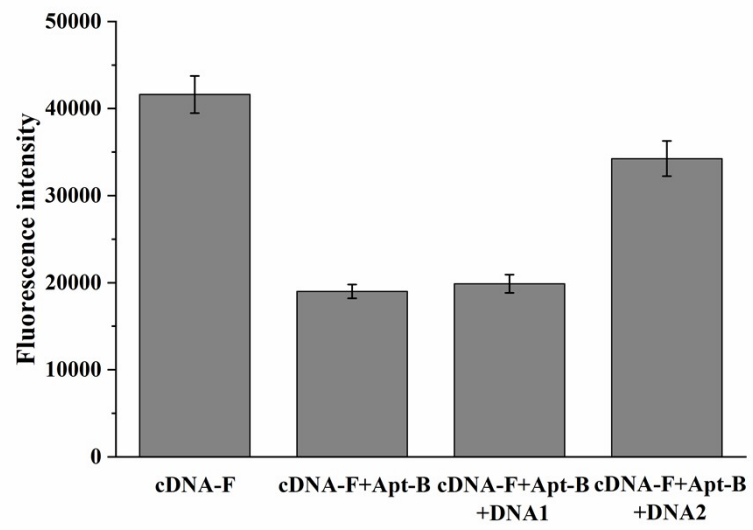

**Fig. S2.** Verification of the principle of the capture probes DNA1 and DNA2.

A

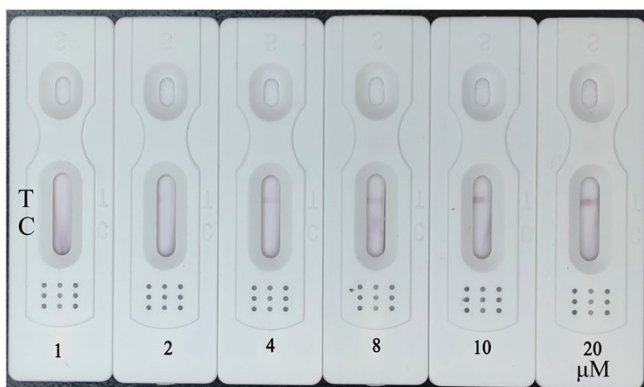

B

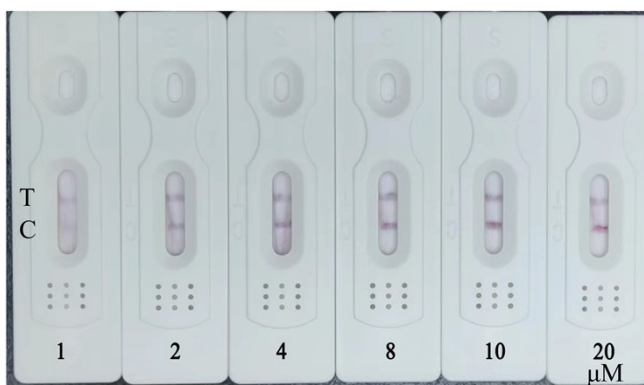

**Fig. S3.** Images of the test strips fabricated with (A) Different concentrations of DNA1 and (B) Different concentrations of DNA2. The concentration of Hcy in the running buffer is 50  $\mu\text{M}$ .

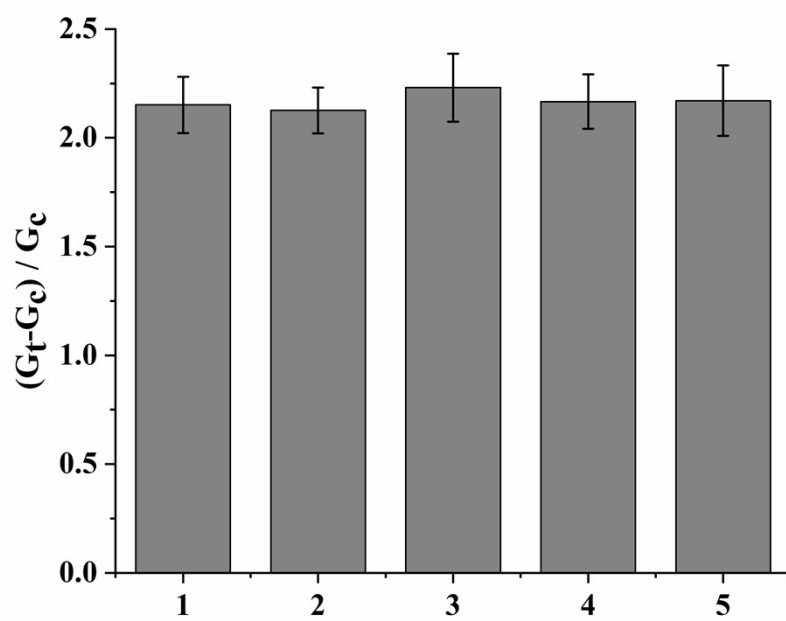

**Fig. S4.** Repeatability evaluation of the test strips.

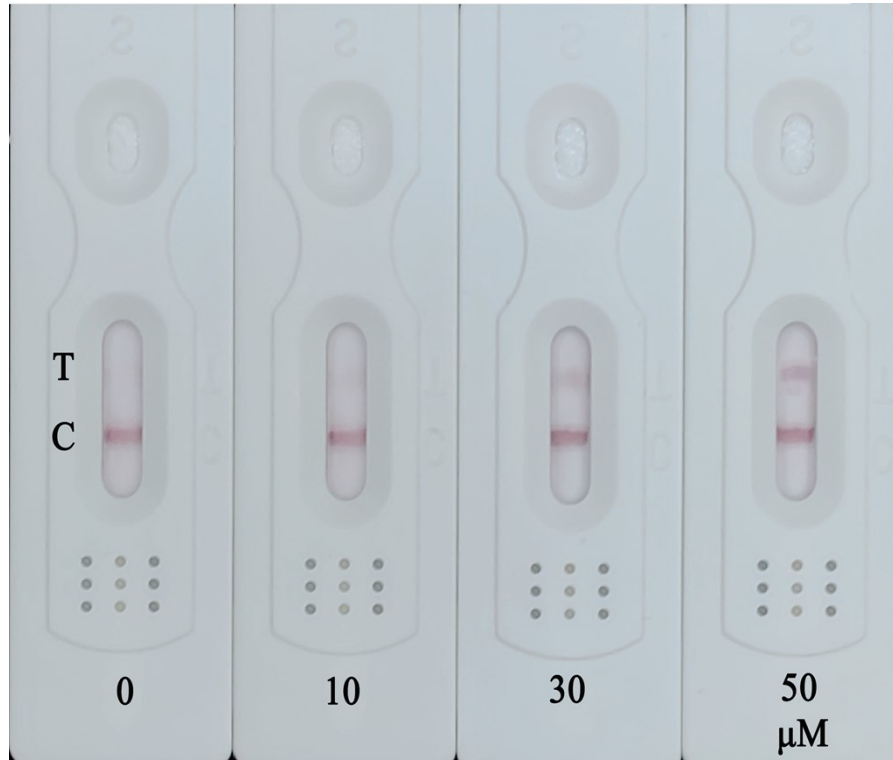

**Fig. S5.** Image of the test strips used to detect homocysteine in human serum with different concentrations.
